# Supplementary material
Source: publisher site journal article supplement (https://www.dovepress.com/get_supplementary_file.php?f=467471.docx)
Supplement: Supplementary file 1 [file get_supplementary_file.php]

**Supplementary Appendix**

**Table S1** Descriptive statistics before and after the DIP payment reform for inpatients from tertiary hospitals in W and Z cities

|  | **Before DIP reform**  **(January–June 2021)** | | **After DIP reform**  **(January–June 2022)** | |
| --- | --- | --- | --- | --- |
| **W City** | **Z City** | **W City** | **Z City** |
| **(1)** | **(2)** | **(3)** | **(4)** |
| **Outcome variables** |  |  |  |  |
| Total expenditure per case, mean (SD), RMB | 7408.38 | 9241.91 | 6480.97 | 9288.69 |
|  | (8926.52) | (12627.17) | (7238.69) | (12800.26) |
| In-hospital mortality rate (%) | 0.18 | 0.20 | 0.09 | 0.22 |
| All-cause readmission rate within 30 days after discharge (%) | 5.97 | 8.18 | 5.63 | 9.01 |
| Proportion of severe patients (%) | 46.71 | 55.60 | 50.13 | 54.68 |
| Related weight per case, mean (SD) | 1.13 | 1.24 | 1.03 | 1.28 |
|  | (1.03) | (1.23) | (0.78) | (1.31) |
| **Patient characteristics** |  |  |  |  |
| Age, mean (SD), years | 49.23 | 53.00 | 50.91 | 53.08 |
|  | (23.07) | (22.40) | (21.76) | (21.81) |
| Female (%) | 51.04 | 48.99 | 50.86 | 49.54 |
| UEBMI (%) | 19.02 | 17.64 | 20.73 | 18.63 |
| Charlson Comorbidity Index, mean (SD) | 0.41 | 0.51 | 0.58 | 0.60 |
|  | (0.70) | (0.83) | (0.87) | (0.86) |
| Sample size | 28,857 | 23,287 | 48,024 | 28,832 |

**Notes:** DIP denoted the diagnosis-intervention packet payment reform. The UEBMI was a basic medical insurance scheme for urban employees.

**Table S2** Descriptive statistics before and after the DIP payment reform for inpatients from secondary hospitals in W and Z cities

|  | **Before DIP reform**  **(January–June 2021)** | | **After DIP reform**  **(January–June 2022)** | |
| --- | --- | --- | --- | --- |
| **W City** | **Z City** | **W City** | **Z City** |
| **(1)** | **(2)** | **(3)** | **(4)** |
| **Outcome variables** |  |  |  |  |
| Total expenditure per case, mean (SD), RMB | 4031.90 | 4082.02 | 3935.38 | 4407.53 |
|  | (4496.19) | (3945.87) | (3773.85) | (3984.77) |
| In-hospital mortality rate (%) | 0.11 | 0.15 | 0.09 | 0.07 |
| All-cause readmission rate within 30 days after discharge (%) | 6.07 | 3.63 | 5.70 | 5.42 |
| Proportion of severe patients, n (%) | 20871 | 17384 | 22544 | 22150 |
|  | (49.18) | (49.43) | (51.10) | (48.59) |
| Related weight per case, mean (SD) | 0.83 | 0.83 | 0.85 | 0.84 |
|  | (0.57) | (0.48) | (0.60) | (0.54) |
| **Patient characteristics** |  |  |  |  |
| Age, mean (SD), years | 51.89 | 49.07 | 53.25 | 49.05 |
|  | (22.08) | (24.28) | (21.59) | (24.19) |
| Female (%) | 54.61 | 53.47 | 53.74 | 53.85 |
| UEBMI (%) | 6.97 | 10.20 | 10.89 | 9.91 |
| Charlson Comorbidity Index, mean (SD) | 0.43 | 0.50 | 0.43 | 0.51 |
|  | (0.73) | (0.79) | (0.77) | (0.79) |
| Sample size | 42,440 | 35,168 | 44,115 | 45,589 |

**Notes:** DIP denoted the diagnosis-intervention packet payment reform. The UEBMI was a basic medical insurance scheme for urban employees.

**Table S3** Impacts of the DIP on treatment intensity: Difference-in-differences estimates

|  | **Whole sample** | **Tertiary hospitals** | **Secondary hospitals** |
| --- | --- | --- | --- |
| **(1)** | **(2)** | **(3)** |
| **Receiving procedure** |  |  |  |
| DIP Payment | 0.068*** | 0.031** | 0.104*** |
|  | (0.016) | (0.014) | (0.026) |
| Sample size | 423,631 | 189,086 | 234,545 |

**Notes:** *** and ** denoted the significance at the 1% and 5% level, respectively. The table reported estimators for receiving procedure based on equation (1), using case-level discharge data from W and Z cities. The estimated difference-in-difference coefficients were reported for the whole sample (columns (1)), patients from tertiary hospitals (column (2)), and patients from secondary hospitals (column(3)). In columns (1)–(3), all specifications included the full set of control variables (i.e., indicators for age groups, gender, insurance types, disease categories, and CCI). We also controlled for hospital fixed effect and year-month fixed effect. Standard errors clustered at the hospital-month level were reported in parentheses.

**Table S4** Robustness checks: Exclude inpatients discharged between September 2021 and December 2021

|  | **Whole sample** | **Tertiary hospitals** | **Secondary hospitals** |
| --- | --- | --- | --- |
| **(1)** | **(2)** | **(3)** |
| **ln(total expenditure per case)** |  |  |  |
| DIP Payment | -0.067*** | -0.134*** | -0.014 |
|  | (0.015) | (0.024) | (0.012) |
| Sample size | 339,364 | 148,197 | 191,167 |
| **In-hospital mortality** |  |  |  |
| DIP Payment (*100) | -0.042 | -0.171*** | 0.039 |
|  | (0.026) | (0.043) | (0.029) |
| Sample size | 339,364 | 148,197 | 191,167 |
| **All-cause readmission within 30 days** |  |  |  |
| DIP Payment | -0.012*** | -0.003 | -0.016*** |
|  | (0.003) | (0.006) | (0.003) |
| Sample size | 339,364 | 148,197 | 191,167 |
| **Severe patients** |  |  |  |
| DIP Payment | 0.014** | 0.030*** | 0.007 |
|  | (0.006) | (0.007) | (0.008) |
| Sample size | 339,364 | 148,197 | 191,167 |
| **ln (****Related weight per case)** |  |  |  |
| DIP Payment | -0.005 | -0.017* | 0.009 |
|  | (0.007) | (0.010) | (0.008) |
| Sample size | 339,364 | 148,197 | 191,167 |

**Notes:** ***, **, and * denoted the significance at the 1%, 5%, and 10% level, respectively. The table reported the results of robustness checks that we excluded inpatients discharged between September 2021 and December 2021 to exclude the influence of preparatory phase of DIP payment.

**Table S5** Robustness checks: Exclude inpatients with tumor and mental diseases

|  | **Whole sample** | **Tertiary hospitals** | **Secondary hospitals** |
| --- | --- | --- | --- |
| **(1)** | **(2)** | **(3)** |
| **ln(total expenditure per case)** |  |  |  |
| DIP Payment | -0.055*** | -0.098*** | -0.019* |
|  | (0.012) | (0.021) | (0.011) |
| Sample size | 406,081 | 178,167 | 227,914 |
| **In-hospital mortality** |  |  |  |
| DIP Payment (*100) | -0.015 | -0.092** | 0.031 |
|  | (0.025) | (0.044) | (0.027) |
| Sample size | 406,081 | 178,167 | 227,914 |
| **All-cause readmission within 30 days** |  |  |  |
| DIP Payment | -0.008*** | 0.000 | -0.013*** |
|  | (0.003) | (0.005) | (0.003) |
| Sample size | 406,081 | 178,167 | 227,914 |
| **Severe patients** |  |  |  |
| DIP Payment | 0.012** | 0.028*** | 0.005 |
|  | (0.006) | (0.006) | (0.008) |
| Sample size | 406,081 | 178,167 | 227,914 |
| **ln (Related weight per case)** |  |  |  |
| DIP Payment | -0.000 | -0.002 | 0.004 |
|  | (0.006) | (0.008) | (0.008) |
| Sample size | 406,081 | 178,167 | 227,914 |

**Notes:** ***, **, and * denoted the significance at the 1%, 5%, and 10% level, respectively. The table reported the results of robustness checks that we excluded inpatients with tumor and mental diseases since these cases may be compensated by other payment system such as per diem.

**Table S6** Robustness checks: Exclude observations in October 2021

|  | **Whole sample** | **Tertiary hospitals** | **Secondary hospitals** |
| --- | --- | --- | --- |
| **(1)** | **(2)** | **(3)** |
| **ln(total expenditure per case)** |  |  |  |
| DIP Payment | -0.059*** | -0.103*** | -0.021* |
|  | (0.013) | (0.021) | (0.011) |
| Sample size | 403,815 | 179,538 | 224,277 |
| **In-hospital mortality** |  |  |  |
| DIP Payment (*100) | -0.027 | -0.106** | 0.022 |
|  | (0.026) | (0.048) | (0.026) |
| Sample size | 403,815 | 179,538 | 224,277 |
| **All-cause readmission within 30 days** |  |  |  |
| DIP Payment | -0.010*** | -0.004 | -0.014*** |
|  | (0.003) | (0.005) | (0.003) |
| Sample size | 403,815 | 179,538 | 224,277 |
| **Severe patients** |  |  |  |
| DIP Payment | 0.013** | 0.025*** | 0.008 |
|  | (0.005) | (0.006) | (0.008) |
| Sample size | 403,815 | 179,538 | 224,277 |
| **ln (Related weight per case)** |  |  |  |
| DIP Payment | -0.001 | -0.006 | 0.007 |
|  | (0.006) | (0.009) | (0.008) |
| Sample size | 403,815 | 179,538 | 224,277 |

**Notes:** ***, **, and * denoted the significance at the 1%, 5%, and 10% level, respectively. The table reported the results of robustness checks that we excluded observations in October 2021 to exclude the influence of the epidemic of COVID-19.

**
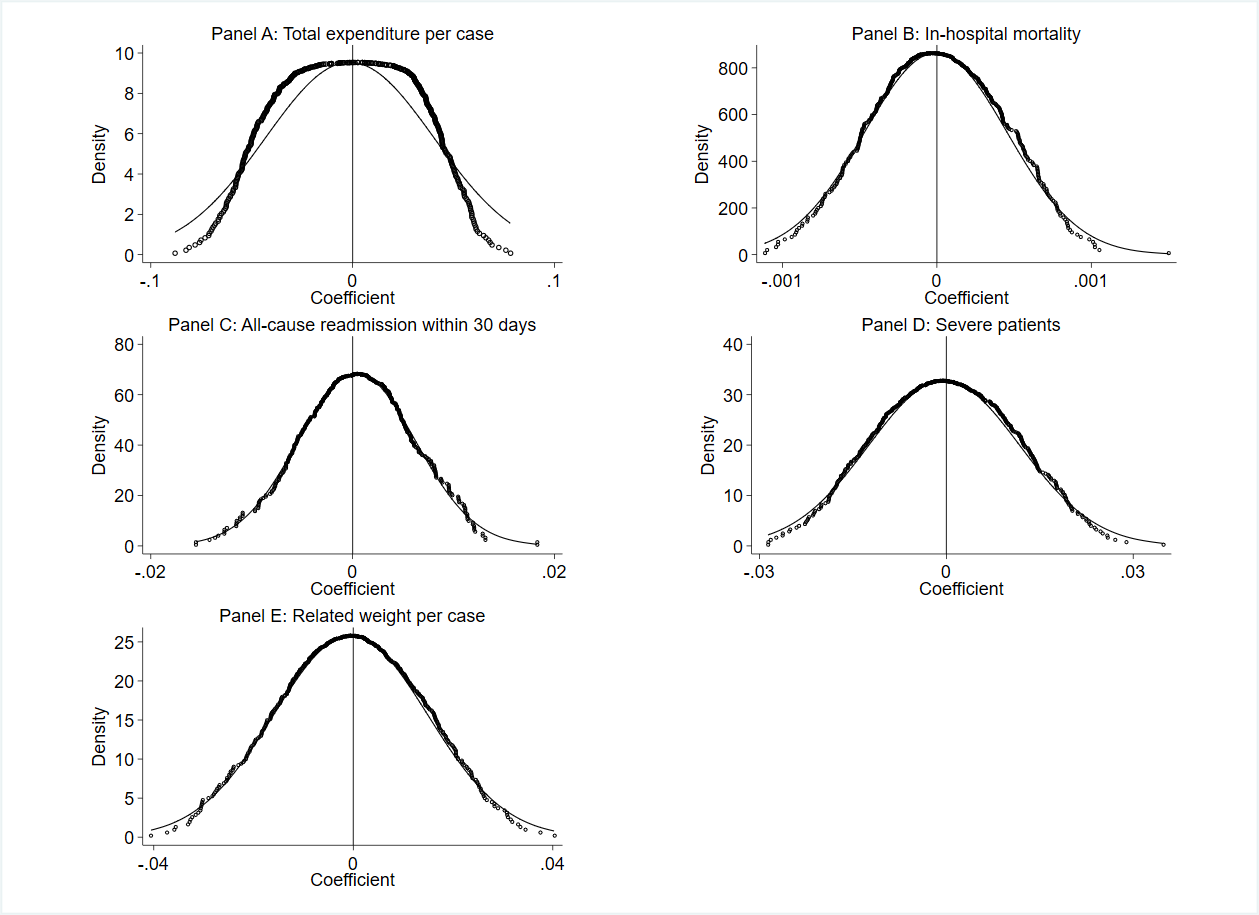
**

**Figure S1** Placebo tests for the whole sample. For the whole sample, we randomly selected the pilot hospitals of the DIP payment reform and generated the reform time respectively, and repeated the difference-in-difference estimation 500 times according to Eq (1). Finally, the density distributions of estimated coefficients of pseudo DIP dummy in equation (1) were plotted. Panels A-E depict the density distributions of total expenditure per case, in-hospital mortality, all-cause readmission within 30 days, severe patients, and RW per case for the entire sample, respectively.


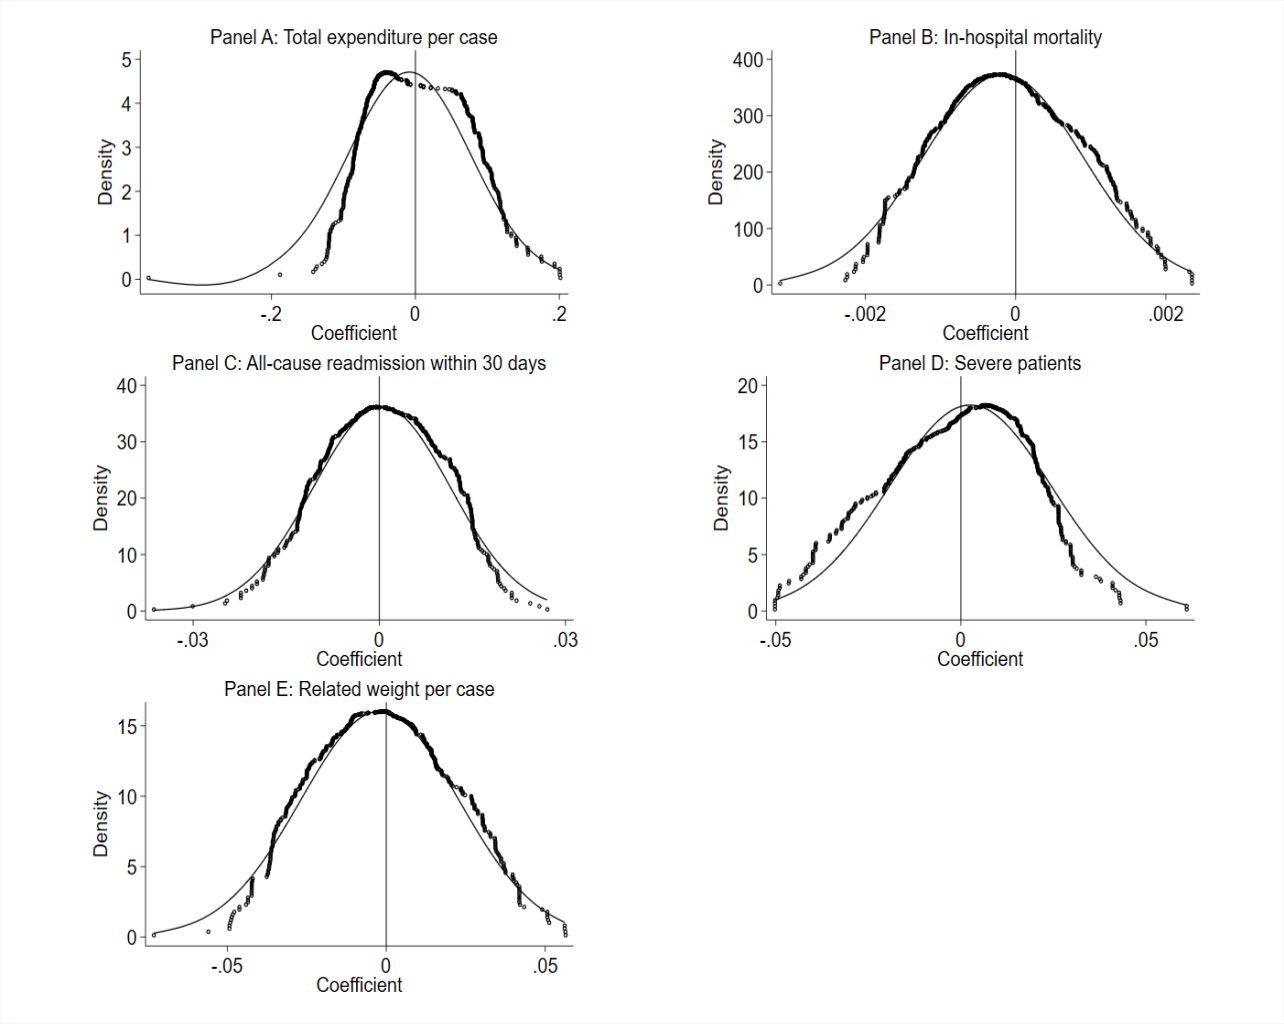


**Figure S2** Placebo tests for inpatients from tertiary hospitals. For inpatients from tertiary hospitals, we randomly selected the pilot hospitals of the DIP payment reform and generated the reform time respectively, and repeated the difference-in-difference estimation 500 times according to equation (1). Finally, the density distributions of estimated coefficients of pseudo DIP dummy in equation (1) were plotted. Panels A-E depict the density distributions of total expenditure per case, in-hospital mortality, all-cause readmission within 30 days, severe patients, and RW per case for the entire sample, respectively.


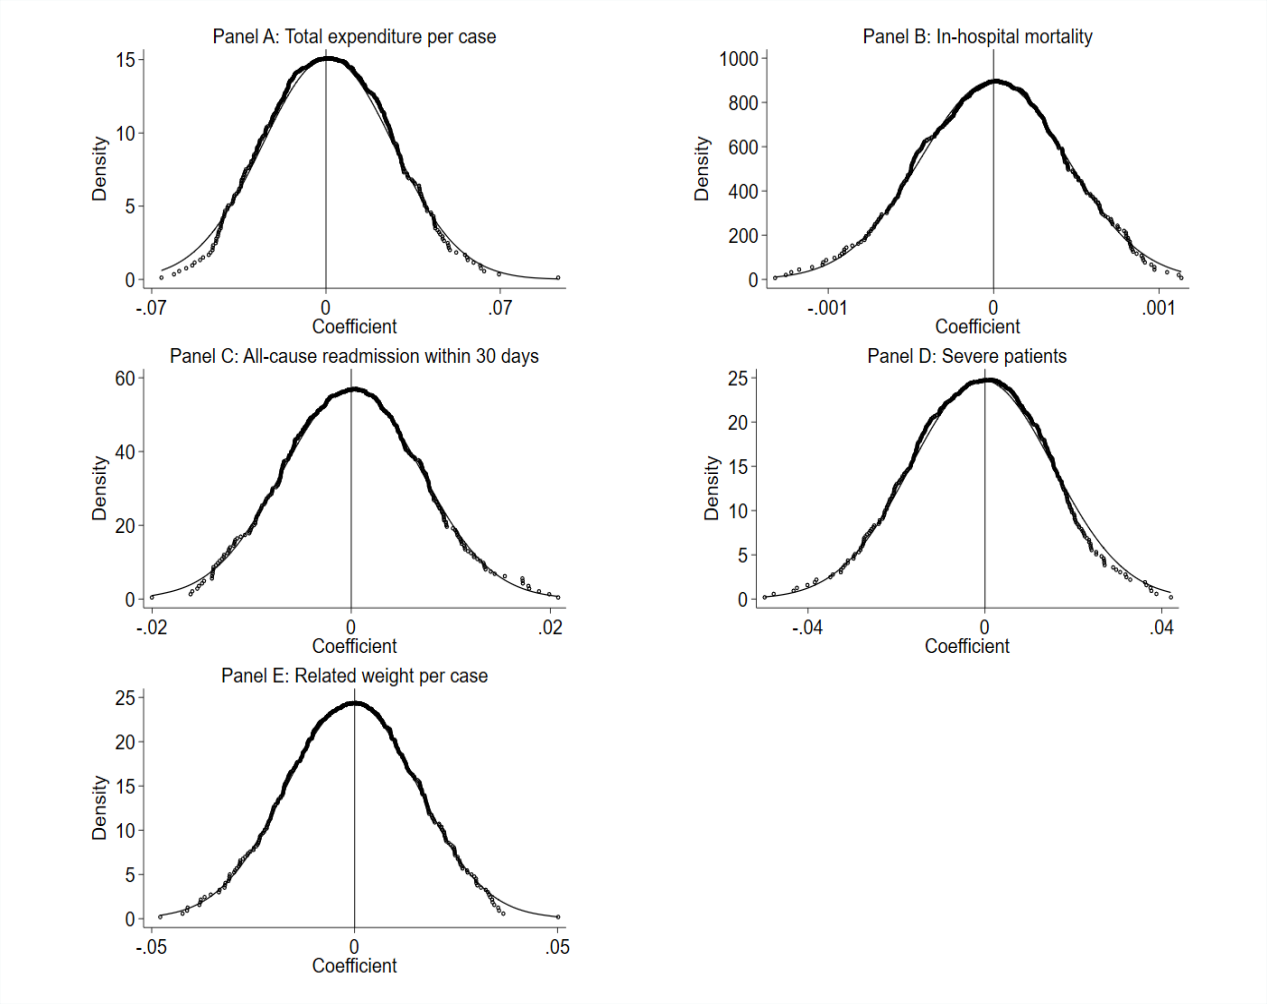


**Figure S3** Placebo tests for inpatients from secondary hospitals. For inpatients from secondary hospitals, we randomly selected the pilot hospitals of the DIP payment reform and generated the reform time respectively, and repeated the difference-in-difference estimation 500 times according to equation (1). Finally, the density distributions of estimated coefficients of pseudo DIP dummy in equation (1) were plotted. Panels A-E depict the density distributions of total expenditure per case, in-hospital mortality, all-cause readmission within 30 days, severe patients, and RW per case for the entire sample, respectively.
